1 Rates of primary production in groundwater rival those in oligotrophic marine systems

2

3 Will A. Overholt<sup>1</sup>, Susan Trumbore<sup>2,3</sup>, Xiaomei Xu<sup>3</sup>, Till L.V. Bornemann<sup>4</sup>, Alexander J. Probst<sup>4</sup>,  
4 Markus Krüger<sup>1</sup>, Martina Herrmann<sup>1,5</sup>, Bo Thamdrup<sup>6</sup>, Laura Bristow<sup>6</sup>, Martin Taubert<sup>1</sup>, Valérie  
5 F. Schwab<sup>2</sup>, Martin Hölzer<sup>7,8</sup>, Manja Marz<sup>7,8,9</sup>, and Kirsten Küsel<sup>1,5\*</sup>

6 1. Aquatic Geomicrobiology, Institute of Biodiversity, Friedrich Schiller University, Jena,  
7 Germany

8 2. Max Planck Institute for Biogeochemistry, Jena, Germany

9 3. Department of Earth System Sciences, University of California, Irvine, CA, USA

10 4. Institute for Environmental Microbiology and Biotechnology, Department of Chemistry,  
11 University Duisburg-Essen, Germany

12 5. German Centre for Integrative Biodiversity Research (iDiv) Halle-Jena-Leipzig, Leipzig,  
13 Germany

14 6. Department of Biology, University of Southern Denmark, Odense M, Denmark

15 7. RNA Bioinformatics and High-Throughput Analysis, Faculty of Mathematics and  
16 Computer Science

17 8. European Virus Bioinformatics Center, Friedrich Schiller University Jena, Jena 07743,  
18 Germany

19 9. FLI Leibniz Institute for Age Research, Marz Associated Research Group, Jena 07745,  
20 Germany

21 \*Corresponding author

## 22 Abstract

23 The terrestrial subsurface contains nearly all of Earth's freshwater reserves<sup>1</sup> and harbors  
24 upwards of 60% of our planet's total prokaryotic biomass<sup>2,3</sup>. While genetic surveys suggest  
25 these organisms rely on *in situ* carbon fixation, rather than the translocation of  
26 photosynthetically derived organic carbon<sup>4-6</sup>, corroborating measurements of carbon fixation in  
27 the subsurface are absent. Using a novel ultra-low level <sup>14</sup>C-labeling technique, we show that *in*  
28 *situ* carbon fixation rates in a carbonate aquifer reached 10% of the median rates measured in  
29 oligotrophic marine surface waters, and were up to six-fold greater than those observed in lower  
30 euphotic zone waters where deep chlorophyll levels peak. Empirical carbon fixation rates were  
31 substantiated by both nitrification and anammox rate data. Metagenomic analyses revealed a  
32 remarkable abundance of putative chemolithoautotrophic members of an uncharacterized order  
33 of Nitrospira – the first representatives of this class expected to fix carbon via the Wood-  
34 Ljungdahl pathway. Based on these fixation rates, we extrapolate global primary production in  
35 carbonate groundwaters to be 0.11 Pg of carbon per year.

36

## 37 Main

38 The continental subsurface is the planet's largest carbon reservoir<sup>7</sup>, housing up to 19% of its  
39 total biomass<sup>2,8</sup> and 99% of its freshwater<sup>1</sup>. Despite accounting for only 6% of total stores,  
40 modern groundwater, *i.e.*, the fraction accrued in aquifers over the past 50 years, is the single-  
41 most significant source of potable water. Carbonate karst aquifers alone are thought to supply  
42 people with nearly 10% of their drinking water<sup>9</sup>. Unfortunately, modern groundwater is also the  
43 most vulnerable to anthropogenic and climatic impacts<sup>1</sup>. While subsurface ecosystems have  
44 long fascinated ecologists<sup>10</sup>, and more recently microbiologists<sup>11</sup>, accessibility, enormous spatial  
45 heterogeneity, and the complete lack of process rate measurements has obscured a meaningful  
46 understanding of their contributions to global biogeochemical cycles<sup>12</sup>.

47 The widespread recognition that Earth's biosphere extends deep into the subsurface  
48 occurred only recently<sup>13</sup>. Historically, carbon supply in such environments was thought to be  
49 limited to the trickling of surface-produced organic matter into the shallow subsurface<sup>5</sup>, or what  
50 was stored within sedimentary rocks<sup>14</sup>. In stark contrast, recent studies have shown that  
51 millimolar concentrations of dissolved H<sub>2</sub> amassed in deep Precambrian Shield fracture  
52 groundwaters support the proliferation of chemolithoautotrophs<sup>15</sup> and ultimately bacterivore  
53 nematodes<sup>16</sup>. A wealth of compelling genetic evidence suggests that *in situ* carbon fixation is  
54 critical for sustaining highly-diverse microbial metabolic networks in groundwater, both in the  
55 shallow and deep subsurface<sup>4,17-23</sup>. Despite the implications of gene-based surveys, the  
56 empirically derived activity measurements required to corroborate such inferences, constrain  
57 biogeochemical fluxes, understand system dynamics, and integrate processes into regional and  
58 global models have yet to be reported. Here we report our use of a novel radiocarbon method to  
59 derive empirical carbon fixation rates and place them in the context of global groundwater.

## 60 Groundwater carbon fixation rates resemble those of marine surface waters

61 In this first ever evaluation of primary productivity in the shallow subsurface (*i.e.*, groundwater  
62 wells 5 – 90 m deep), experimental carbon fixation rates varied from  $0.043 \pm 0.01$  to  $0.23 \pm 0.10$   
63  $\mu\text{g C l}^{-1} \text{d}^{-1}$  (mean  $\pm$  SD; Fig. 1 A, Table S2, Supp. Info.). The ultra-low level <sup>14</sup>C labeling  
64 approach developed in this investigation exploits the high sensitivity of accelerator mass  
65 spectrometry, thereby minimizing impacts to groundwater hydrochemical equilibria and affording  
66 shorter incubation times. This method is particularly useful within a carbonate geological setting,  
67 where high dissolved inorganic carbon (DIC) backgrounds and a scarcity of microbes warrant  
68 greater sensitivity than is achievable via scintillation-based <sup>14</sup>C-labeling approaches. Rates  
69 resulting from our novel labeling technique likely approximate net primary productivity rather  
70 than gross productivity, as has been reported for marine systems<sup>24,25</sup>, and we further expect  
71 them to be conservative estimates for carbon fixation (Supp. Info.).

72 We compared these carbon fixation rates that were measured in groundwater of varying  
73 biogeochemical characteristics<sup>26</sup> with the only other subsurface <sup>14</sup>CO<sub>2</sub> assimilation  
74 measurements reported: those of a deep (830-1078 m) groundwater borehole from crystalline  
75 bedrock in Sweden<sup>27</sup>. To do so, we converted the published rates of isotopic incorporation to  
76 carbon equivalents, revealing the lower but overlapping range of 0.0095 to 0.056  $\mu\text{gC l}^{-1} \text{d}^{-1}$ .

77 To better understand the relevance of the rates measured, we further compared them to  
78 those of well documented oligotrophic marine surface waters. Unlike our samples, the carbon

79 fixed in these waters was sourced almost entirely by bacterial photoautotrophs<sup>28,29</sup>. When  
80 compared directly to a comprehensive dataset compiled by Liang *et al.*<sup>30</sup>, our rates overlapped  
81 with those of global marine waters at depths to 140 m, equating to roughly 10% of the reported  
82 global median for 0-20 m depths ( $2.65 \mu\text{g l}^{-1} \text{d}^{-1}$ , interquartile range (IQR) = 1.74, 6.02), and 20%  
83 of the median for 20-140 m depths ( $1.2 \mu\text{g l}^{-1} \text{d}^{-1}$ , IQR = 0.6, 1.7). Comparisons to the  
84 extensively studied Sargasso Sea in the Bermuda Atlantic Timeseries Study (BATS)<sup>31,32</sup> and the  
85 Hawaiian Oceanographic Timeseries (HOTS)<sup>33</sup> datasets yielded similar findings (Fig. 2). Our  
86 rate measurements ranged between three and 23% of the median reported net primary  
87 productivity in the upper euphotic zones (down to ~ 120 m) and 20 to 600% of the median of the  
88 lower euphotic region (100 - 120m) where deep chlorophyll levels peak.

89 We also considered contributions to existing particulate organic carbon (POC) stocks  
90 and new carbon inputs per microbial cell count. After normalizing for estimated total bacterial  
91 cell numbers, groundwater yielded 0.3 - 10.8 fg of fixed carbon per bacterial cell per day (Table  
92 S5), which matched estimates of 0.25 - 12.1 fg C per bacterial cell per day across the marine  
93 photic zone (5 - 150 m). However, groundwater received new daily carbon inputs of only  $0.47\% \pm 0.22\%$   
94  $\pm 0.22\%$  (mean  $\pm$  SD, Table S5) of its existing POC, much lower than the marine system's  $2.6\% \pm 2.9\%$   
95  $\pm 2.9\%$  gain in the lower euphotic zone and  $22\% \pm 18\%$  at the surface<sup>34,35</sup>. This disparity might  
96 stem from the larger recalcitrant fraction of particulate organic carbon in groundwater compared  
97 to oligotrophic oceans, which is supported by deviations in <sup>14</sup>C and <sup>13</sup>C signatures of total  
98 groundwater POC concentrations compared to lipid signatures of resident microbes<sup>36</sup>.

## 99 An ecosystem dominated by chemolithoautotrophs

100 To identify dominant microbial primary producers, a total of 4,175 metagenome-assembled  
101 genomes (MAGs) were generated from groundwater samples, 1,224 of which passed quality  
102 thresholds. Of these, 102 putative chemolithoautotrophs exhibiting at least 50% completion  
103 scores for carbon fixation pathways were identified (Fig. 3). Almost exclusively bacterial (101),  
104 these MAGs represented 17 distinct phyla, 21 classes, and 35 families (Fig. 3, Table S3). In  
105 some samples, up to 12% of metagenomic reads from a sample could be recruited to these  
106 chemolithoautotrophic MAGs (Supp. Info., Fig. S3). A single archaeal MAG of the family  
107 Nitrosopumilaceae encoded gene products for the 4-hydroxybutyrate 3-hydroxypropionate  
108 pathway and was not relatively abundant (< 5x max normalized coverage).

109 Three chemolithoautotrophic pathways were detected (Fig. 1 B): the Calvin-Benson-  
110 Bassham (CBB), Wood-Ljungdahl (WL), and reverse TCA (rTCA) cycles were present in 37, 50,  
111 and 15 MAGs, respectively. The summed and normalized relative coverages of MAGs equipped  
112 with these metabolic pathways aligned with the carbon fixation rates measured in wells H52,  
113 H32, and H14, while contrasting with rate data from wells H41 and H43 (Fig. 1, Supp. Info.). The  
114 greatest relative abundances of chemolithoautotrophs were detected in oxic well H41 and  
115 anoxic well H52. Anoxic groundwater was dominated by putative sulfur oxidizing (53% of  
116 summed and normalized coverages of all chemolithoautotrophic MAGs) and anaerobic  
117 ammonium oxidizing (anammox [10%]) autotrophic microbes, while oxic groundwaters harbored  
118 greater abundances of potential nitrifiers (76%; Fig. S4 B, Supp. Info.).

## 119 Poorly characterized microbes influence carbon fixation potential

120 The most abundant putative chemolithoautotrophic populations represented by MAGs  
121 generated from anoxic groundwater were of poorly studied and/or uncharacterized microbial  
122 lineages. Those most abundant in oxic groundwaters, however, were phylogenetically and  
123 metabolically similar to well-characterized microbes (Supp. Info.). In both cases, metabolic  
124 reconstructions suggested that dominant subpopulations could access a diverse suite of  
125 (in)organic electron acceptors and donors. We mapped previously generated RNA-seq data <sup>37</sup>  
126 to these MAGs to confirm the active expression of gene products involved in energy acquisition  
127 and carbon fixation. As opposed to the broad distributions posited by DNA-based abundances,  
128 transcript data revealed far more restrictive ranges in which specific gene products were favored  
129 (Fig. 3). Given their metabolic versatility and the results of previous cultivation-based analyses  
130 <sup>38</sup>, these populations are expected to be mixotrophic, *i.e.* capable of supplementing carbon  
131 requirements with available organic matter. Overall, carbon fixation in anoxic groundwater was  
132 predicted to be fueled by reduced sulfur and there were three highly abundant, sulfur-oxidizing  
133 MAGs identified, each accounting for > 2% of the total metagenomic reads in some samples  
134 (100-400x normalized coverages).

135 The most abundant MAG encountered in this study belongs to a deep-branching order,  
136 9FT-COMBO-42-15, of class Nitrospira and is the first representative of Class Nitrospira  
137 thought to fix carbon via the WL pathway (Fig. 3, Fig. 4A, Supp. Info.). As there is precedence  
138 for autotrophic WL-utilizing bacteria within phylum Nitrospirota, and *Ca. Magnetobacterium* was  
139 characterized with an equally flexible metabolism, these traits may be more widespread within  
140 the phylum than previously thought <sup>39</sup>. In addition, two MAGs capable of coupling sulfur  
141 oxidation to carbon-fixation via the CBB cycle were identified as members of the  
142 Sulfurifustaceae family of Proteobacteria (Supplemental Information, Figure 4 B). These MAGs  
143 recruited 10-fold more transcripts than their Nitrospirota counterparts and were among the most  
144 transcriptionally active chemolithoautotrophic genomes detected (Fig. 3, Fig. 4, Supp. Info.).  
145 With its closest reference genomes *Sulfuricaulis limicola* and *Ca. Muproteobacteria*  
146 (RIFCSPHIGHO2\_12\_FULL\_60\_33), the taxonomic identity of this family is under debate. Per  
147 GTDB classification nomenclature, Muproteobacteria belong to the Sulfurifustaceae family, and  
148 members of this family have been posited to oxidize sulfur in both aquatic and terrestrial  
149 environments <sup>40-42</sup>.

150 Planctomycetota MAGs, predicted to couple anaerobic ammonium oxidation to carbon  
151 fixation via the WL pathway, exhibited mean transcriptional activities on par with their  
152 Sulfurifustaceae MAG counterparts (Fig.3, Fig. 4C, Supp. Info.). The elevated transcriptional  
153 activity of gene products germane to the CBB and WL pathways suggests that taxa wielding  
154 such functions play a disproportionately large role in chemolithoautotrophy relative to their DNA-  
155 based abundances. Surprisingly, all putative anammox MAGs detected were transcriptionally  
156 active in oxic groundwater (Fig. 3, Fig.4 B; wells H41 and H51). Anammox reactions are  
157 typically inhibited in the presence of oxygen <sup>43</sup>, although microbes will still express critically  
158 important genes in low oxygen environments <sup>44,45</sup>.

## 159 Nitrogen-based rate measurements validate carbon fixation rates

160 To evaluate the relationship between anammox and carbon fixation in anoxic groundwaters, we  
161 compared the rates of each in a well harboring the greatest relative abundance of anaerobic  
162 ammonium oxidizing bacteria (well H52). Well H52 exhibited anammox rates of  $1.2 \pm 0.5$  nmol  
163  $\text{N}_2 \text{ l}^{-1} \text{ d}^{-1}$ . Empirical stoichiometric data demonstrates that 1.02 moles of  $\text{N}_2$  is produced via  
164 anaerobic ammonium oxidation for every 0.066 moles of  $\text{CH}_2\text{O}_{0.5}\text{N}_{0.15}$  reduced to biomass<sup>46</sup>.  
165 Assuming equivalent stoichiometry, the rate of carbon fixation via anammox in groundwater  
166 would be  $0.93 \pm 0.39$  ng C  $\text{l}^{-1} \text{ d}^{-1}$ , more than 200 times lower than the  $220$  ng C  $\text{l}^{-1} \text{ d}^{-1}$  measured.  
167 This result is corroborated by metagenomic data that suggest the high rate of carbon fixation in  
168 anoxic groundwater is more likely driven by reduced sulfur than reduced nitrogen.

169 Metagenomic and metatranscriptomic data predicted that nearly all of the organic carbon  
170 produced under oxic conditions in well H41 would be coupled to nitrification. To test this, we  
171 monitored the rate of aerobic ammonium oxidation in this well and recorded a mean production  
172 of  $125.8 \pm 5.9$  nmol  $\text{NO}_2^- + \text{NO}_3^- \text{ l}^{-1} \text{ d}^{-1}$ . Since the most abundant nitrifiers detected were most  
173 closely related to complete ammonium oxidizing bacteria (Supp. Info.), we based our  
174 calculations on the 394 mg protein per mol of ammonia growth yields of *Nitrospira inopinata*, a  
175 comammox organism<sup>47</sup>. Assuming a cellular composition of  $\text{C}_5\text{H}_7\text{O}_2\text{N}^{48}$  and 55% protein  
176 content, we estimated a rate of  $48.5 \pm 1.9$  ng C  $\text{l}^{-1} \text{ d}^{-1}$ , which was well within the range of error  
177 for our measured rate of  $43 \pm 13$  ng C  $\text{l}^{-1} \text{ d}^{-1}$  confirming the importance of nitrification for carbon  
178 fixation at this site.

## 179 Global estimates for groundwater primary productivity

180 There are an estimated 22.6 million  $\text{km}^3$  of groundwater on Earth<sup>1</sup>, 2.26 and 12.66 million  $\text{km}^3$   
181 of which are housed in carbonate and crystalline aquifers, respectively. If we assume that our  
182 average rates accurately represent carbonate groundwater systems, then  $0.108 \pm 0.069$  Pg  
183 (mean  $\pm$  SD) of carbon is fixed every year in this global ecosystem (Table S4). If the values  
184 reported from crystalline aquifers<sup>27</sup> are representative of this environment, then another  $0.15 \pm$   
185  $0.11$  Pg C would be fixed there every year. Collectively, the net primary productivity of  $\sim 66\%$   
186 of the planet's groundwater reservoirs would total  $0.26$  Pg C  $\text{yr}^{-1}$ , approximately 0.5% that of  
187 marine systems and 0.25% of global NPP estimates<sup>49</sup>. Applying the lowest measured values  
188 from each rock type yields the more conservative estimate of  $0.079$  Pg C  $\text{yr}^{-1}$ , 0.076% of the  
189 global NPP. Although the total production rates in groundwater seem small, this is because of  
190 the relatively small volume of groundwater compared to the vast surface ocean - what is most  
191 surprising is that terrestrial subsurface fixation rates are approaching those of phototrophic  
192 organisms.

## 193 Conclusions

194 Using a novel ultra-low level  $^{14}\text{C}$ -labeling technique to generate empirically derived estimates of  
195 primary productivity in groundwater for the first time, we showed that carbon fixation rates in a  
196 carbonate aquifer reached 10% of the median rates reported in oligotrophic marine surface  
197 waters and six-fold greater than those observed in the deep chlorophyll maximum of the lower  
198 euphotic zone. Normalizing rates according to estimated bacterial numbers revealed equivalent

199 carbon input (*i.e.*, 0.3 - 12 fg C per cell) for both systems, despite the fact that daily inputs of  
200 new POC were 40 times greater in marine waters than in groundwater. This disparity makes  
201 sense, since trophic webs are simpler in the subsurface, and the export of organic matter is  
202 constrained by long water residence times within the aquifer. As the vast majority of  
203 photosynthetically derived carbon in marine systems is labile (half-life < 1 day), the findings of  
204 this study solicit new hypotheses regarding carbon cycling in the subsurface, particularly those  
205 positing newly synthesized carbon rather than surface-derived organic matter as the primary  
206 source of fuel for microbiota.

207 Complementary metagenomic analyses identified novel microbes capable of exploiting  
208 metabolic pathways previously unreported for their given phylotype. Carbon fixation rates  
209 coincided with the potential for chemolithoautotrophy in three of the five groundwater wells  
210 examined. Comprehensive metabolic reconstructions revealed versatile metabolisms with  
211 access to numerous sources of electron donors and acceptors, particularly in taxa detected in  
212 high abundance in anoxic and hypoxic groundwater. While these populations were widely  
213 distributed across broad biogeochemical regimes, the use of previously generated  
214 metatranscriptomes helped identify more specific activities.

215 Nitrogen-based transformations provided independent validation of carbon fixation rates  
216 in oxic waters and corroborated metagenomic data that hinted at the inconsequential impact of  
217 anammox on carbon fixation in anoxic groundwater. If our average rates accurately represent all  
218 carbonate groundwater systems, then  $0.108 \pm 0.069$  (mean  $\pm$  SD) Pg of carbon (0.22% of global  
219 marine NPP) is fixed every year under these geologic settings. Applying these rates of carbon  
220 fixation to ecosystem processes alters the way we think about these environments, challenges  
221 the importance of surface-derived organic matter fluxes on shallow subsurface functioning, and  
222 establishes a framework broadly applicable across groundwater systems.

## 223 Methods

### 224 Site description

225 Groundwater samples were sampled from the Hainich Critical Zone Exploratory (NW Thuringia,  
226 Germany)<sup>26,50,51</sup>. This aquifer assemblage consists of a multistory, fractured system composed  
227 of alternating layers of limestone and mudstone that developed along a hillslope of Upper  
228 Muschelkalk bedrock<sup>26</sup>. The primary aquifer, represented in this study by wells H41 and H51, is  
229 oxic and lies within the Trochitenkalk formation (moTK). Primarily suboxic to anoxic, mudstone-  
230 dominated overhanging strata lies within the Meissner formation (moM) and is represented here  
231 by wells H14 (moM - substory 1), H32 (moM - 5, 6, 7), H43 (moM - 8), and H52 (moM - 3, 4).  
232 Geochemically, H32 and H41 coalesce into a single cluster while each of the other wells  
233 represent distinct regimes. Consistent with previous microbiological characterizations, however,  
234 each well studied represented a distinct community state<sup>52</sup>.

### 235 <sup>14</sup>C-DIC incorporation assay

236 This method, similar to a sensitive methane oxidation technique previously described<sup>53</sup>, is a  
237 modification of traditional <sup>14</sup>C-CO<sub>2</sub> primary productivity approaches<sup>54</sup> predicated upon the  
238 sensitivity offered by accelerator-based mass spectrometry. Groundwater was collected in July

239 2020 during sampling campaign PNK130, as described by Herrmann et al.<sup>23</sup>. After  
240 approximately three well volumes had been discharged and physicochemical parameters  
241 stabilized, groundwater was collected directly into nine pre-sterilized 2-liter borosilicate bottles,  
242 from the bottom up. Bottles were then overfilled with > two volumes and sealed with gas-tight  
243 rubber stoppers. Triplicate samples from each well were then subjected to three treatments. A  
244 labelling treatment consisted of  $6.77 \times 10^{-7}$  mmol C-NaHCO<sub>3</sub> which contained 200 Bq of activity  
245 [50 µCi; American Radiolabeled Chemicals (ARC), St. Louis, MO] diluted to 9.38 Bq/µl with  
246 sterilized milliQ water, adjusted to pH 10, and verified using a scintillation counter. An  
247 advantage of this <sup>14</sup>C technique is that the small amount of tracer added (representing  
248 0.000006% of the total DIC) did not change the substrate concentration or influence conditions  
249 like pH that could affect microbial populations. Kill controls were prepared in the same way,  
250 except 10 ml of 50% ZnCl<sub>2</sub> (w/v; final conc. 36.7 mM) was added to inhibit microbial activity.  
251 Unamended groundwater was also used as a control. All bottles were incubated in the dark at  
252 near *in situ* temperature for ~ 24 hours. Entire volumes were acidified to pH 4 with 3M HCl,  
253 bubbled with N<sub>2</sub> for one h to remove DIC, and then filtered through pre-baked (550 °C 8 hours)  
254 quartz fibers (47 mm, 0.3µm pore size, Macherey-Nagel QN-10) using pre-baked filter stands  
255 (EMD Millipore).

256 Filters were vacuum dried, sealed in quartz tubes with cupric oxide wire under vacuum,  
257 and combusted at 900 °C for two hours. Evolved CO<sub>2</sub> was purified cryogenically, measured as  
258 pressure in a known volume to determine C content, and reduced to graphite for measurement  
259 by accelerator mass spectrometry at the WM Keck Carbon Cycle Accelerator Mass  
260 Spectrometry facility<sup>55</sup>. From the label incorporation and amount of carbon retained on the filters  
261 (Supplemental Data File), fixation rates were calculated using equation (1):

$$(1) \text{ carbon fixation rate (mgC l}^{-1} \text{ d}^{-1}) = \frac{[\frac{^{14}\text{C}}{^{12}\text{C}}\text{sample} - \frac{^{14}\text{C}}{^{12}\text{C}}\text{control}] * \text{POC}_{\text{mg}}}{\frac{^{14}\text{C}}{^{12}\text{C}}\text{DIC}_{\text{sample}} * V * T}$$

262  
263

264 The technical variation was at most 3.6% (median = 0.78%) of the biological variation for the <sup>14</sup>C  
265 measurements and was not considered in standard error of the mean calculations. Standard  
266 error of the mean was determined for both the <sup>14</sup>C-based measurements (difference between  
267 two sets of triplicates, label and control, or label and kill controls) and POC measurements (all  
268 nine bottles from each well), separately. These errors were then propagated to yield the final  
269 error estimations. Analyses of variance and post-hoc Tukey HSD tests were conducted on  
270 resulting summary statistics (mean ± SEM) using the following utility: [https://acetabulum.dk/cgi-](https://acetabulum.dk/cgi-bin/anova)  
271 [bin/anova](https://acetabulum.dk/cgi-bin/anova). All <sup>14</sup>C enrichment values were calculated using the differences between the 200 Bq-  
272 labeled samples and the 200 Bq-labeled kill controls. Rates calculated based on no-label  
273 addition controls are presented in Table S2. Data from global oligotrophic marine systems was  
274 included from Supplementary Data Sheet 1<sup>30</sup>, the Bermuda Atlantic Timeseries years 1988-  
275 2016 via FTP ([http://batsftp.bios.edu/BATS/production/bats\\_primary\\_production.txt](http://batsftp.bios.edu/BATS/production/bats_primary_production.txt))<sup>31</sup>, and from  
276 the Hawaiian Oceanographic Timeseries via FTP  
277 ([ftp://ftp.soest.hawaii.edu/hot/primary\\_production](ftp://ftp.soest.hawaii.edu/hot/primary_production)). POC data from both sites was extracted from  
278 Dryad datasets generated by Martiny et al.<sup>34,35</sup>. Bacterial cell number estimates for HOTs were  
279 obtained from the FTP site: <https://hahana.soest.hawaii.edu/FTP/hot/microscopy/EPIslides.txt>.

## 280 <sup>15</sup>N-isotope incubation experiments

281 Groundwater from wells H41 and H52 was collected in September 2018 and November 2018 to  
282 measure nitrification rates and anammox rates, respectively. Briefly, groundwater was collected  
283 into sterile glass bottles, from the bottom up, using a sterile tube. Bottles were then overfilled  
284 with three volume exchanges, and sealed headspace free with silicone septa. Each sample was  
285 collected in triplicate alongside one control bottle per well. Samples were kept at 4°C until they  
286 were processed (no more than 2 h post-collection).

287 For nitrification measurements, 10 ml was removed from each sampling bottle (total vol.  
288 0.5 L) and replaced with N<sub>2</sub> to analyze inorganic nitrogen and pH. Groundwater from control  
289 bottles was sterile filtered through a 0.2 µm filter (Supor, Pall Corporation, USA). Sterile filtered  
290 <sup>15</sup>N ammonium sulfate solution (98%, Cambridge Isotope Laboratories, Tewksbury), serving as  
291 a substrate for ammonia oxidizing prokaryotes, was then added to a final conc. of 50 µM.  
292 Samples were incubated at 15°C in the dark *sans* agitation for five days. Ten-mL fractions were  
293 removed and replaced with N<sub>2</sub> at the outset of the experiment and after 12, 24, 48, 70 and 120  
294 hours via filtration through 0.2 µm filters, which were stored at -20°C for isotopic ratio mass  
295 spectrometry (IRMS) analyses. Additional 10 ml fractions were removed at intervals to monitor  
296 pH and inorganic nitrogen during the incubation.

297 For anammox rate measurements, sampling bottles (total vol. 1 L) were flushed with N<sub>2</sub>  
298 under sterile conditions for 30 minutes to remove all remnants of oxygen. Five-mL fractions  
299 were removed and replaced with N<sub>2</sub> from each sample (and control) bottle to assess  
300 background <sup>14</sup>NH<sub>4</sub><sup>+</sup> concentrations. Subsequently, samples were spiked with either (a) 50 µM  
301 <sup>15</sup>NH<sub>4</sub><sup>+</sup> + 5 µM <sup>14</sup>NO<sub>2</sub><sup>-</sup> or (b) 5 µM <sup>15</sup>NO<sub>2</sub><sup>-</sup> as previously described<sup>56</sup>. Control bottles, serving as  
302 abiotic controls were sterile filtered (0.2 µm filters; Supor, Pall Corporation, USA) prior to  
303 flushing and the addition of nitrogen compounds. To facilitate destructive sampling at eight time  
304 points, groundwater (30 mL; in triplicate) was dispensed into sterile serum bottles leaving ~ 8  
305 mL of headspace. Bottles were immediately sealed with butyl septa, crimp sealed and the  
306 headspace was purged with He. All bottles were then incubated in the dark at 15°C *sans*  
307 agitation and incubations were terminated after 0, 12, 24, 36, 48, 60, 72 and 96 hours by adding  
308 300 µl of 50% (v/w) aqueous zinc chloride solution.

309 Nitrification rates were determined based on <sup>15</sup>NO<sub>2</sub><sup>-</sup> + <sup>15</sup>NO<sub>3</sub><sup>-</sup> production in incubations  
310 with <sup>15</sup>NH<sub>4</sub><sup>+</sup>. <sup>15</sup>NO<sub>2</sub><sup>-</sup> and <sup>15</sup>NO<sub>3</sub><sup>-</sup> were converted to N<sub>2</sub> via cadmium reduction followed by a  
311 sulfamic acid addition<sup>57,58</sup>. The N<sub>2</sub> produced (<sup>14</sup>N<sup>15</sup>N and <sup>15</sup>N<sup>15</sup>N) was analyzed on a gas  
312 chromatography isotope ratio mass spectrometer as previously described<sup>59</sup>. Rates were  
313 evaluated from the slope of the linear regression of <sup>15</sup>N produced with time and corrected for the  
314 fraction of the NH<sub>4</sub><sup>+</sup> pool labelled in the initial substrate pool. The production of <sup>15</sup>N labeled N<sub>2</sub>  
315 from anammox was analyzed on the same IRMS as for nitrification rates, and calculated as  
316 described<sup>60</sup>. Note, denitrification was not detected in any of the <sup>15</sup>NO<sub>2</sub><sup>-</sup> incubations. T-tests were  
317 applied (p < 0.05) to assess whether rates were significantly different from zero (Fig. S2).

## 318 DNA extraction & sample preparation

319 Samples used to generate metagenomic libraries were collected in January 2019 during  
320 sampling campaign PNK 110. For each sample replicate, approximately 50 - 100 L of  
321 groundwater was filtered sequentially through 0.2 µm and 0.1 µm pore sized PTFE filters (142



322 mm, Omnipore Membrane, Merck Millipore, Germany; Table S1). With the exception of H32 (did  
323 not yield sufficient volumes), each well was sampled in triplicate. H32 was duplicated using a  
324 sample previously collected during campaign PNK108 (November 2018). Filters were frozen on  
325 dry ice and stored at -80 °C prior to extraction. DNA was extracted using a phenol-chloroform  
326 based method, as previously described<sup>61</sup>, and resulting DNA extracts were purified using a  
327 Zymo DNA Clean & Concentrator kit. Metagenome libraries were generated with a NEBNext  
328 Ultra II FS DNA library preparation kit, in accordance with manufacturer's protocols. DNA  
329 fragment sizes were estimated using an Agilent Bioanalyzer DNA 7500 instrument with High  
330 Sensitivity kits depending on DNA concentrations and recommendations of protocols (Table  
331 S1). Sequencing of the 32 samples was performed at the Core DNA Sequencing Facility of the  
332 Fritz Lipmann Institute in Jena, Germany using an Illumina NextSeq 500 system (2 x 150bp).  
333 Resulting metagenomic library sizes ranged from 16.4 to 22.1 Gbp (mean = 19.6 Gbp; Table  
334 S1), and raw data was deposited into the ENA under project PRJEB36523.

### 335 Metagenomic assembly and binning

336 Adapters were trimmed and raw sequences subjected to quality control processing using BBduk  
337 v38.51<sup>62</sup>. Assembly and binning were performed as previously described<sup>63</sup>. Briefly, all libraries  
338 were independently assembled into scaffolds using metaSPAdes v3.12<sup>64</sup>, all of which were  
339 taxonomically classified per Bornemann et al.<sup>63</sup>. For individual assemblies, open reading  
340 frames (ORFs) were identified using Prodigal v2.6.3 in meta mode<sup>65</sup>. To generate coverage  
341 profiles, all quality-assessed and quality-controlled (QAQC) sequences from each of the 32  
342 metagenomic libraries were mapped back to each of the 32 scaffold databases using Bowtie2  
343 v2.3.4.3 in the sensitive mode<sup>66</sup>.

344 Scaffolds were binned using differential coverages and tetranucleotide frequencies with  
345 Maxbin2<sup>67</sup>. Additionally, ESOM and abawaca<sup>68</sup> were used for both manual and automatic  
346 binning, based on tetranucleotide sequence signatures, using 3 kbp and 5 kbp or 5 kbp and 10  
347 kbp as minimum scaffold sizes, respectively. DAS Tool<sup>69</sup> was used with default parameters to  
348 reconcile resulting bin sets. Complete sets of bins from each of the samples were dereplicated  
349 using dRep v2.4.0<sup>70</sup>. All scaffolds, bin assignments, ORF predictions, and taxonomic  
350 annotations were then imported into Anvi'o v6.0<sup>71</sup>. Each of the resulting 1,275 bins was  
351 manually curated in Anvi'o v6, considering both coverage and sequence compositions. In the  
352 end, 1,224 bins passed the 30% completeness [median = 61%, IQR = (49%,73%)] and 10%  
353 redundancy [median = 0%, IQR = (0%,1.4%)] quality thresholds.

### 354 Characterizations of the Metagenome-assembled Genomes

355 ORFs originating from all of the resulting metagenome-assembled genomes (MAGs) were  
356 annotated using kofamscan<sup>72</sup> with the "detail" flag, and KO annotations were filtered using a  
357 custom script (<https://git.io/JtHVw>). This utility preserves hits with scores of at least 80% of the  
358 kofamscan defined threshold, as well as those exhibiting a score > 100 if there is no threshold.  
359 We elected to relax the default thresholds since all MAGs representing putatively  
360 chemolithoautotrophic microbes were verified manually, and we noticed that the best reciprocal  
361 blast hits with known reference sequences routinely scored below the kofamscan thresholds,  
362 *i.e.*, we favored false positives over false negatives since we included a secondary verification  
363 step.

364 KEGGDecoder<sup>73</sup> was used to assess the metabolic potential of five of the primary  
365 chemolithoautotrophic pathways: the Calvin-Benson-Bassham cycle, the Wood-Ljungdahl  
366 pathway, the reverse citric acid cycle, the 4-hydroxybutyrate 3-hydroxypropionate pathway, and  
367 the 3-hydroxypropionate bicycle. MAGs were examined in greater depth if a given pathway was  
368 > 50% complete. MAGs representing potential chemolithoautotrophs were re-annotated using  
369 the online BlastKoala server<sup>74</sup> with essential steps verified through blast<sup>75</sup> against the RefSeq  
370 database. A collection of HMM models was used to determine which form of Rubisco was  
371 detected, along with potential hydrogenases<sup>41</sup>. Using blastp<sup>75</sup>, dissimilatory bisulfite reductases  
372 (*dsrAB*) were compared to a database compiled by Pelikan *et al.*<sup>76</sup> to predict whether the  
373 pathway operated in an oxidative or reductive manner. Blast was used to compare gene hits for  
374 *narGH/nxrAB* (nitrate reductase / nitrite oxidoreductase) to a custom database based on  
375 sequences presented within Lückner *et al.*<sup>77</sup>.

376 All QAQC reads were remapped to a database consisting of only contigs of dereplicated  
377 MAGs. Normalized coverages for each of the MAGs was determined by scaling the resulting  
378 Anvi'o-determined coverages based on the number of RNA polymerase B (*rpoB*) genes  
379 identified in the QAQC-filtered reads. *RpoB* sequences were identified using ROCKER with the  
380 precomputed model<sup>78</sup>. Scaling factors were calculated by dividing the maximum number of  
381 *rpoB* identified in the 32 metagenomic libraries by the number of *rpoB* detected in each sample.  
382 Reported values represent averages of the triplicates/replicates, unless stated otherwise. The  
383 taxonomy of each MAG was evaluated using the GTDB\_TK tool kit<sup>79</sup> in concert with the  
384 Genome Taxonomy Database (release 89)<sup>80,81</sup> and its associated utilities<sup>65,82-86</sup>. Single copy  
385 marker genes were identified and aligned with GTDB\_TK for all bacterial MAGs, and a  
386 phylogenetic tree of the concatenated alignment was constructed using FastTree2 v2.1.10 in  
387 accordance with the JTT+CAT evolutionary model. The resulting phylogenetic tree was then  
388 imported into iTOL<sup>87</sup> for visualization, and all MAGs were subjected to growth rate index (Grid)  
389 analysis within each metagenomic library<sup>88</sup>.

390 Previously generated mRNA-enriched and post-processed metatranscriptomic libraries  
391 were procured from project PRJEB28783<sup>37</sup>. The groundwater source of these  
392 metatranscriptomes was collected in August and November 2015. QAQC filtered reads were  
393 mapped to MAGs using Bowtie2 v2.3.5 in sensitive mode<sup>66</sup>, and the total number of *rpoB*  
394 transcripts from each metatranscriptomic library were determined, as described above for  
395 metagenomes. The transcriptomic coverages for each ORF from each MAG were determined  
396 using Anvi'o v6 and normalized via scaling factor calculations based on the total number of *rpoB*  
397 reads from the original metatranscriptome library (*i.e.*, the coverage of each ORF from each  
398 MAG was normalized to a community-wide estimate of the transcriptional activity of a house-  
399 keeping gene in each sample). Means were determined considering all of the  
400 metatranscriptomes generated from a given well, including different sampling timepoints. While  
401 well H32 was only sampled once, mean values from all other wells account for three to four  
402 metatranscriptome coverages each. Additionally, an average of the resulting normalized  
403 coverages for each MAG from each sample (sum of the MAG transcriptional coverage divided  
404 by the number of ORFs) was determined to estimate the relative transcriptional activity of the  
405 MAGs across the transect. Data was compiled and processed using R v.3.5.2 with Rstudio  
406 v1.1.463<sup>89,90</sup> and the tidyverse package<sup>91</sup>, and color schemes were generated using the  
407 RColorBrewer utility<sup>92</sup>. All MAGs were deposited in project PRJEB36505's data repository.

## 408 Acknowledgments

409 We thank Falko Gutmann, Heiko Minkmar, Perla Abigail Figueroa-Gonzalez, and the Hainich  
410 CZE site manager Robert Lehmann for their assistance with sample preparation, collection, and  
411 filtration. We also thank Martin Nowak and John Southon for advice regarding <sup>14</sup>C-bicarbonate  
412 supplementation and quantification of AMS results, respectively. Additionally, we thank Ivonne  
413 Görlich and Marco Groth from the Core Facility DNA sequencing of the Leibniz Institute on  
414 Aging - Fritz Lipmann Institute in Jena for their help with Illumina sequencing.  
415 This study is part of the Collaborative Research Centre AquaDiva of the Friedrich Schiller  
416 University Jena, funded by the Deutsche Forschungsgemeinschaft (DFG, German Research  
417 Foundation) – SFB 1076 –Project Number 218627073. ST, XX and VFS acknowledge additional  
418 support from the European Research Council (Horizon 2020 Research and Innovation  
419 Programme, grant agreement 695101). MT gratefully acknowledges funding from the DFG  
420 under Germany's Excellence Strategy - EXC 2051 - Project-ID 390713860. TLVB and AJP were  
421 supported by the Ministerium für Kultur und Wissenschaft des Landes Nordrhein-Westfalen  
422 ('Nachwuchsgruppe Dr. Alexander Probst'). Climate chambers to conduct experiments under  
423 controlled temperature conditions were financially supported by the Thüringer Ministerium für  
424 Wirtschaft, Wissenschaft und Digitale Gesellschaft (TMWWDG; project B 715-09075). The  
425 scientific results have in part been computed at the High-Performance Computing (HPC) Cluster  
426 EVE, a joint effort of both the Helmholtz Centre for Environmental Research - UFZ  
427 (<http://www.ufz.de/>) and the German Centre for Integrative Biodiversity Research (iDiv) Halle-  
428 Jena-Leipzig (<http://www.idiv-biodiversity.de/>).

## 429 Data Availability

430 The metagenomic raw data, individual sample assemblies, and the metagenome-assembled-  
431 genomes for this study were deposited into the ENA under project PRJEB36523. All raw and  
432 summarized AMS data is available in the Supplemental Data File.  
433

## 434 Author contributions

435 KK, ST, WAO and MT designed this study. WAO, KK, AJP, TLVB, MM, MH, and MT planned,  
436 designed, and conducted the metagenomic sampling approach. WAO, TLVB, and AJP  
437 performed the metagenomic analysis. WAO, ST, XX, and VFS performed the carbon fixation  
438 experiments and interpreted the results. MK, MH, BT, and LB conducted the anammox and  
439 nitrification rate measurements. WAO, KK and ST wrote the manuscript with the help of all  
440 authors.

441  
442  
443  
444

## 445 Figures

446 (Vector graphics versions of all figures are attached as a separate document)

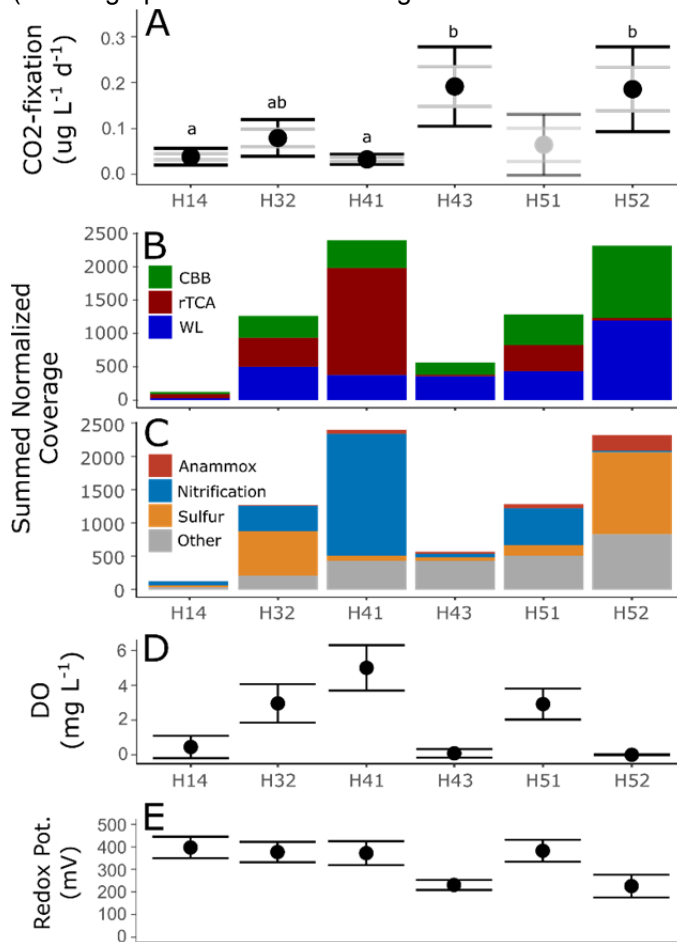

447

448

449 Fig. 1. (A) Rates of carbon fixation across the aquifer transect. Outer error bars depict one  
450 standard deviation while inner grey bars delineate standard error of the mean. Rates for well  
451 H51 are derived from non-labeled controls (see Supp. Info.). Letters denote the results of  
452 ANOVA and posthoc Tukey tests (H51 was excluded from testing). (B) Relative importance of  
453 the predicted carbon fixation pathways and (C) electron donor sources in each well. Values are  
454 averages from the triplicate 0.2- $\mu$ m filtered fraction metagenome samples. (D) Mean dissolved  
455 oxygen concentrations in groundwater collected in summer months (May through September  
456 2010 - 2018), error bars depict standard deviation. (E) Redox potential measurements from  
457 identical time points.

458

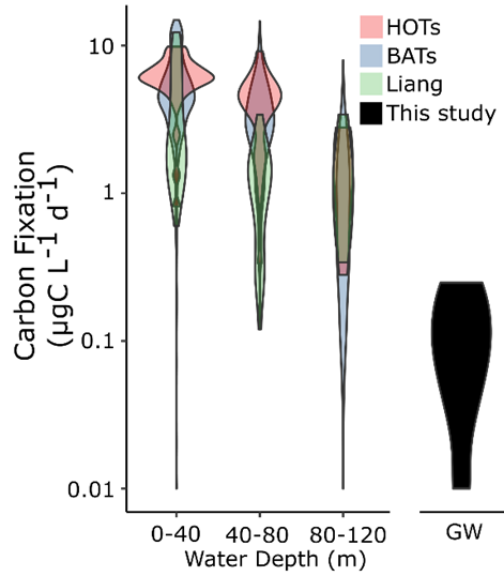

459

460 Fig. 2. Violin plots depicting the distribution of carbon fixation rates measured in oligotrophic  
461 marine surface waters and groundwater. HOTS = Hawaiian Oceanographic Timeseries (1999,  
462 cruises 101-110), BATs = data from 1988-2016 for the Bermuda Atlantic Timeseries, and Liang  
463 = a collated dataset compiled by Liang *et al.*, 2017. GW represents the range of groundwater  
464 samples within the Hainich CZE.

465

466

467

468

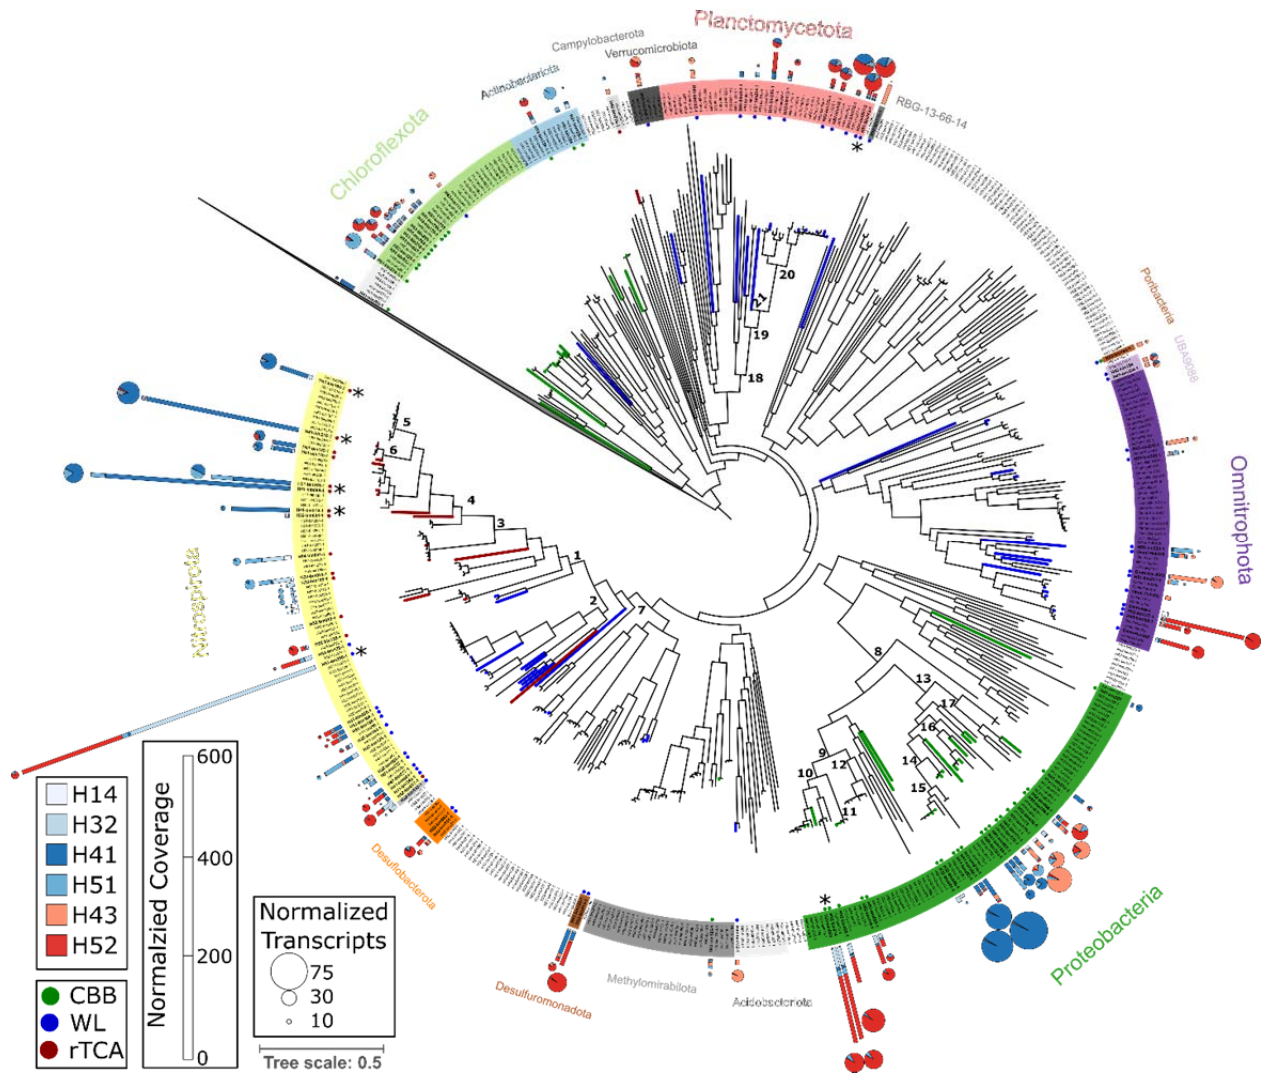

469  
470

471 Figure 3. Approximately-maximum-likelihood phylogenetic tree based on concatenated single-  
 472 copy protein alignments for all bacterial MAGs considered. Branches are colored according to  
 473 the predicted carbon fixation pathway, and the matching leaf is indicated by a point. Bar charts  
 474 present average normalized metagenomic coverages within each well from triplicate 0.2- $\mu$ m  
 475 filtered fractions. Pie charts show the coverage of mRNA transcripts recruited, normalized to  
 476 gene number and library size. CBB = Calvin-Benson-Basham cycle, WL = Wood Ljungdahl  
 477 pathway, rTCA = reverse TCA cycle. Asterisks denote MAGs discussed in greater detail in  
 478 Supp. Info. The tree is rooted using Patescibacteria (CPR) as an outgroup, indicated by the  
 479 collapsed grey leaf in the upper left. Node numbers represent: (1) c\_Nitrospiria, (2)  
 480 c\_Thermodesulfobivibronia, (3) o\_Nitrospirales, (4) f\_Nitrospiraceae, (5) g\_Nitrospira\_D, (6)  
 481 g\_Nitrospira, (7) p\_Nitrospinota, (8) c\_Gammaproteobacteria, (9) o\_Acidiferrobacterales, (10)  
 482 f\_Sulfurifustaceae, (11) g\_SM1-46, (12) f\_UBA6901, (13) o\_Burkholderiales, (14)  
 483 f\_Nitrosomonadaceae, (15) g\_Nitrosomonas, (16) f\_SG8-41, (17) f\_SG8-39, (18) c\_Brocadiae,  
 484 (19) o\_Brocadiales, (20) f\_Brocadiaceae, and (21) f\_Scalinduaceae.

485  
486



## 496 References

- 497 1. Gleeson, T., Befus, K. M., Jasechko, S., Luijendijk, E. & Cardenas, M. B. The global  
498 volume and distribution of modern groundwater. *Nat. Geosci.* **9**, 161–167 (2016).
- 499 2. Magnabosco, C. *et al.* The biomass and biodiversity of the continental subsurface. *Nat.*  
500 *Geosci.* **11**, 707–717 (2018).
- 501 3. Flemming, H.-C. & Wuertz, S. Bacteria and archaea on Earth and their abundance in  
502 biofilms. *Nat. Rev. Microbiol.* **17**, 247–260 (2019).
- 503 4. Probst, A. J. *et al.* Differential depth distribution of microbial function and putative symbionts  
504 through sediment-hosted aquifers in the deep terrestrial subsurface. *Nat Microbiol* **3**, 328–  
505 336 (2018).
- 506 5. Griebler, C. & Lueders, T. Microbial biodiversity in groundwater ecosystems. *Freshw. Biol.*  
507 **54**, 649–677 (2009).
- 508 6. Probst, A. J. *et al.* Lipid analysis of CO<sub>2</sub>-rich subsurface aquifers suggests an autotrophy-  
509 based deep biosphere with lysolipids enriched in CPR bacteria. *ISME J.* **14**, 1547–1560  
510 (2020).
- 511 7. Falkowski, P. *et al.* The global carbon cycle: a test of our knowledge of earth as a system.  
512 *Science* **290**, 291–296 (2000).
- 513 8. McMahon, S. & Parnell, J. Weighing the deep continental biosphere. *FEMS Microbiol. Ecol.*  
514 **87**, 113–120 (2014).
- 515 9. Stevanović, Z. Karst waters in potable water supply: a global scale overview. *Environ. Earth*  
516 *Sci.* **78**, 662 (2019).
- 517 10. Poulson, T. L. & White, W. B. The cave environment. *Science* **165**, 971–981 (1969).
- 518 11. Rusterholtz, K. J. & Mallory, L. M. Density, activity, and diversity of bacteria indigenous to a  
519 karstic aquifer. *Microb. Ecol.* **28**, 79–99 (1994).
- 520 12. Smith, H. J. *et al.* Impact of hydrologic boundaries on microbial planktonic and biofilm  
521 communities in shallow terrestrial subsurface environments. *FEMS Microbiol. Ecol.* **94**,  
522 (2018).
- 523 13. Alexander, M. *Introduction to Soil Microbiology*. (Wiley, 1977).
- 524 14. Krumholz, L. R., McKinley, J. P., Ulrich, G. A. & Suflita, J. M. Confined subsurface microbial  
525 communities in Cretaceous rock. *Nature* **386**, 64–66 (1997).
- 526 15. Lollar, B. S. *et al.* Hydrogeologic Controls on Episodic H<sub>2</sub> Release from Precambrian  
527 Fractured Rocks—Energy for Deep Subsurface Life on Earth and Mars. *Astrobiology* **7**,  
528 971–986 (2007).
- 529 16. Borgonie, G. *et al.* Nematoda from the terrestrial deep subsurface of South Africa. *Nature*  
530 **474**, 79–82 (2011).
- 531 17. Magnabosco, C. *et al.* A metagenomic window into carbon metabolism at 3 km depth in  
532 Precambrian continental crust. *ISME J.* **10**, 730–741 (2016).
- 533 18. Stevens, T. O. & McKinley, J. P. Lithoautotrophic Microbial Ecosystems in Deep Basalt  
534 Aquifers. *Science* **270**, 450–455 (1995).
- 535 19. Tiago, I. & Veríssimo, A. Microbial and functional diversity of a subterrestrial high pH  
536 groundwater associated to serpentinization. *Environ. Microbiol.* **15**, 1687–1706 (2013).
- 537 20. Mccollom, T. M. & Amend, J. P. A thermodynamic assessment of energy requirements for  
538 biomass synthesis by chemolithoautotrophic micro-organisms in oxic and anoxic



- 539 environments. *Geobiology* **3**, 135–144 (2005).
- 540 21. Momper, L., Jungbluth, S. P., Lee, M. D. & Amend, J. P. Energy and carbon metabolisms in  
541 a deep terrestrial subsurface fluid microbial community. *ISME J.* **11**, 2319–2333 (2017).
- 542 22. Jewell, T. N. M., Karaoz, U., Brodie, E. L., Williams, K. H. & Beller, H. R.  
543 Metatranscriptomic evidence of pervasive and diverse chemolithoautotrophy relevant to C,  
544 S, N and Fe cycling in a shallow alluvial aquifer. *ISME J.* **10**, 2106–2117 (2016).
- 545 23. Herrmann, M., Ruzsnyák, A. & Akob, D. M. Large fractions of CO<sub>2</sub>-fixing microorganisms in  
546 pristine limestone aquifers appear to be involved in the oxidation of reduced sulfur and  
547 nitrogen compounds. *Applied and* (2015).
- 548 24. Peterson, B. J. Aquatic Primary Productivity and the 14C-CO<sub>2</sub> Method: A History of the  
549 Productivity Problem. *Annu. Rev. Ecol. Syst.* **11**, 359–385 (1980).
- 550 25. Viviani, D. A., Karl, D. M. & Church, M. J. Variability in photosynthetic production of  
551 dissolved and particulate organic carbon in the North Pacific Subtropical Gyre. *Frontiers in*  
552 *Marine Science* **2**, 73 (2015).
- 553 26. Kohlhepp, B. *et al.* Aquifer configuration and geostructural links control the groundwater  
554 quality in thin-bedded carbonate–siliciclastic alternations of the Hainich CZE, central  
555 Germany. *Hydrol. Earth Syst. Sci.* **21**, 6091–6116 (2017).
- 556 27. Pedersen, K. & Ekendahl, S. Assimilation of CO<sub>2</sub> and introduced organic compounds by  
557 bacterial communities in groundwater from southeastern Sweden deep crystalline bedrock.  
558 *Microb. Ecol.* **23**, 1–14 (1992).
- 559 28. Partensky, F. & Garczarek, L. Prochlorococcus: advantages and limits of minimalism. *Ann.*  
560 *Rev. Mar. Sci.* **2**, 305–331 (2010).
- 561 29. Karl, D. M., Hebel, D. V., Björkman, K. & Letelier, R. M. The role of dissolved organic  
562 matter release in the productivity of the oligotrophic North Pacific Ocean. *Limnol. Oceanogr.*  
563 **43**, 1270–1286 (1998).
- 564 30. Liang, Y. *et al.* Estimating Primary Production of Picophytoplankton Using the Carbon-  
565 Based Ocean Productivity Model: A Preliminary Study. *Front. Microbiol.* **8**, 1926 (2017).
- 566 31. Steinberg, D. K. *et al.* Overview of the US JGOFS Bermuda Atlantic Time-series Study  
567 (BATS): a decade-scale look at ocean biology and biogeochemistry. *Deep Sea Res. Part 2*  
568 *Top. Stud. Oceanogr.* **48**, 1405–1447 (2001).
- 569 32. Gundersen, K., Orcutt, K. M., Purdie, D. A., Michaels, A. F. & Knap, A. H. Particulate  
570 organic carbon mass distribution at the Bermuda Atlantic Time-series Study (BATS) site.  
571 *Deep Sea Res. Part 2 Top. Stud. Oceanogr.* **48**, 1697–1718 (2001).
- 572 33. Karl, D. M. & Lukas, R. The Hawaii Ocean Time-series (HOT) program: Background,  
573 rationale and field implementation. *Deep Sea Res. Part 2 Top. Stud. Oceanogr.* **43**, 129–  
574 156 (1996).
- 575 34. Martiny, A. C., Vrugt, J. A. & Lomas, M. W. Concentrations and ratios of particulate organic  
576 carbon, nitrogen, and phosphorus in the global ocean. *Sci Data* **1**, 140048 (2014).
- 577 35. Martiny, A. C., Vrugt, J. A. & Lomas, M. W. Data from: Concentrations and ratios of  
578 particulate organic carbon, nitrogen, and phosphorus in the global ocean. *Dryad Dataset*  
579 (2015) doi:10.5061/dryad.d702p.
- 580 36. Schwab, V. F. *et al.* 14C-Free Carbon Is a Major Contributor to Cellular Biomass in  
581 Geochemically Distinct Groundwater of Shallow Sedimentary Bedrock Aquifers. *Water*  
582 *Resour. Res.* **55**, 2104–2121 (2019).

- 583 37. Wegner, C.-E. *et al.* Biogeochemical Regimes in Shallow Aquifers Reflect the Metabolic  
584 Coupling of the Elements Nitrogen, Sulfur, and Carbon. *Appl. Environ. Microbiol.* **85**,  
585 (2019).
- 586 38. Taubert, M. *et al.* Sulfur-fueled chemolithoautotrophs replenish organic carbon inventory in  
587 groundwater. *Cold Spring Harbor Laboratory* 2021.01.26.428071 (2021)  
588 doi:10.1101/2021.01.26.428071.
- 589 39. Lin, W. *et al.* Genomic insights into the uncultured genus ‘Candidatus Magnetobacterium’ in  
590 the phylum Nitrospirae. *ISME J.* **8**, 2463–2477 (2014).
- 591 40. Kato, S. *et al.* Genome-enabled metabolic reconstruction of dominant chemosynthetic  
592 colonizers in deep-sea massive sulfide deposits. *Environ. Microbiol.* **20**, 862–877 (2018).
- 593 41. Anantharaman, K. *et al.* Thousands of microbial genomes shed light on interconnected  
594 biogeochemical processes in an aquifer system. *Nat. Commun.* **7**, 13219 (2016).
- 595 42. Kojima, H., Watanabe, T. & Fukui, M. *Sulfuricaulis limicola* gen. nov., sp. nov., a sulfur  
596 oxidizer isolated from a lake. *Int. J. Syst. Evol. Microbiol.* **66**, 266–270 (2016).
- 597 43. Strous, M., Van Gerven, E., Kuenen, J. G. & Jetten, M. Effects of aerobic and microaerobic  
598 conditions on anaerobic ammonium-oxidizing (anammox) sludge. *Appl. Environ. Microbiol.*  
599 **63**, 2446–2448 (1997).
- 600 44. Ji, X., Wu, Z., Sung, S. & Lee, P.-H. Metagenomics and metatranscriptomics analyses  
601 reveal oxygen detoxification and mixotrophic potentials of an enriched anammox culture in  
602 a continuous stirred-tank reactor. *Water Res.* **166**, 115039 (2019).
- 603 45. Dalsgaard, T. *et al.* Oxygen at nanomolar levels reversibly suppresses process rates and  
604 gene expression in anammox and denitrification in the oxygen minimum zone off northern  
605 Chile. *MBio* **5**, e01966 (2014).
- 606 46. Strous, M., Heijnen, J. J., Kuenen, J. G. & Jetten, M. S. M. The sequencing batch reactor  
607 as a powerful tool for the study of slowly growing anaerobic ammonium-oxidizing  
608 microorganisms. *Appl. Microbiol. Biotechnol.* **50**, 589–596 (1998).
- 609 47. Kits, K. D. *et al.* Kinetic analysis of a complete nitrifier reveals an oligotrophic lifestyle.  
610 *Nature* **549**, 269–272 (2017).
- 611 48. Rittmann, B. E. & McCarty, P. L. *Environmental biotechnology: principles and applications*.  
612 (McGraw-Hill Education, 2001).
- 613 49. Field, C. B., Behrenfeld, M. J., Randerson, J. T. & Falkowski, P. Primary production of the  
614 biosphere: integrating terrestrial and oceanic components. *Science* **281**, 237–240 (1998).
- 615 50. Lehmann, R. & Totsche, K. U. Multi-directional flow dynamics shape groundwater quality in  
616 sloping bedrock strata. *J. Hydrol.* **580**, 124291 (2020).
- 617 51. Küsel, K. *et al.* How Deep Can Surface Signals Be Traced in the Critical Zone? Merging  
618 Biodiversity with Biogeochemistry Research in a Central German Muschelkalk Landscape.  
619 *Front Earth Sci. Chin.* **4**, 32 (2016).
- 620 52. Yan, L. *et al.* Environmental selection shapes the formation of near-surface groundwater  
621 microbiomes. *Water Res.* **170**, 115341 (2019).
- 622 53. Pack, M. A. *et al.* A method for measuring methane oxidation rates using lowlevels of <sup>14</sup>C-  
623 labeled methane and accelerator mass spectrometry: Methane oxidation rates by AMS.  
624 *Limnol. Oceanogr. Methods* **9**, 245–260 (2011).
- 625 54. Nielsen, E. S. The Use of Radio-active Carbon (<sup>14</sup>C) for Measuring Organic Production in  
626 the Sea. *ICES J. Mar. Sci.* **18**, 117–140 (1952).

- 627 55. Xu, X. *et al.* Modifying a sealed tube zinc reduction method for preparation of AMS graphite  
628 targets: Reducing background and attaining high precision. *Nucl. Instrum. Methods Phys.*  
629 *Res. B* **259**, 320–329 (2007).
- 630 56. Kumar, S. *et al.* Nitrogen Loss from Pristine Carbonate-Rock Aquifers of the Hainich Critical  
631 Zone Exploratory (Germany) Is Primarily Driven by Chemolithoautotrophic Anammox  
632 Processes. *Front. Microbiol.* **8**, 1951 (2017).
- 633 57. Füssel, J. *et al.* Nitrite oxidation in the Namibian oxygen minimum zone. *ISME J.* **6**, 1200–  
634 1209 (2012).
- 635 58. McIlvin, M. R. & Altabet, M. A. Chemical conversion of nitrate and nitrite to nitrous oxide for  
636 nitrogen and oxygen isotopic analysis in freshwater and seawater. *Anal. Chem.* **77**, 5589–  
637 5595 (2005).
- 638 59. Dalsgaard, T., Thamdrup, B., Fariás, L. & Revsbech, N. P. Anammox and denitrification in  
639 the oxygen minimum zone of the eastern South Pacific. *Limnol. Oceanogr.* **57**, 1331–1346  
640 (2012).
- 641 60. Thamdrup, B. *et al.* Anaerobic ammonium oxidation in the oxygen-deficient waters off  
642 northern Chile. *Limnol. Oceanogr.* **51**, 2145–2156 (2006).
- 643 61. Taubert, M. *et al.* Tracking active groundwater microbes with D2O labelling to understand  
644 their ecosystem function. *Environ. Microbiol.* **20**, 369–384 (2018).
- 645 62. Bushnell, B. BBTools software package. URL <http://sourceforge.net/projects/bbmap>  
646 (2014).
- 647 63. Bornemann, T. L. V. *et al.* Geological degassing enhances microbial metabolism in the  
648 continental subsurface. *Cold Spring Harbor Laboratory* 2020.03.07.980714 (2020)  
649 doi:10.1101/2020.03.07.980714.
- 650 64. Nurk, S., Meleshko, D., Korobeynikov, A. & Pevzner, P. A. metaSPAdes: a new versatile  
651 metagenomic assembler. *Genome Res.* **27**, 824–834 (2017).
- 652 65. Hyatt, D. *et al.* Prodigal: prokaryotic gene recognition and translation initiation site  
653 identification. *BMC Bioinformatics* **11**, 119 (2010).
- 654 66. Langmead, B. & Salzberg, S. L. Fast gapped-read alignment with Bowtie 2. *Nat. Methods*  
655 **9**, 357 (2012).
- 656 67. Wu, Y.-W., Simmons, B. A. & Singer, S. W. MaxBin 2.0: an automated binning algorithm to  
657 recover genomes from multiple metagenomic datasets. *Bioinformatics* **32**, 605–607 (2016).
- 658 68. Brown, C. T. *et al.* Unusual biology across a group comprising more than 15% of domain  
659 Bacteria. *Nature* **523**, 208–211 (2015).
- 660 69. Sieber, C. M. K. *et al.* Recovery of genomes from metagenomes via a dereplication,  
661 aggregation and scoring strategy. *Nat Microbiol* **3**, 836–843 (2018).
- 662 70. Olm, M. R., Brown, C. T., Brooks, B. & Banfield, J. F. dRep: a tool for fast and accurate  
663 genomic comparisons that enables improved genome recovery from metagenomes through  
664 de-replication. *ISME J.* **11**, 2864–2868 (2017).
- 665 71. Murat Eren, A. *et al.* Anvi'o: an advanced analysis and visualization platform for 'omics  
666 data. *PeerJ* **3**, e1319 (2015).
- 667 72. Aramaki, T. *et al.* KofamKOALA: KEGG Ortholog assignment based on profile HMM and  
668 adaptive score threshold. *Bioinformatics* **36**, 2251–2252 (2020).
- 669 73. Graham, E. D., Heidelberg, J. F. & Tully, B. J. Potential for primary productivity in a  
670 globally-distributed bacterial phototroph. *ISME J.* **12**, 1861–1866 (2018).

- 671 74. Kanehisa, M., Sato, Y. & Morishima, K. BlastKOALA and GhostKOALA: KEGG Tools for  
672 Functional Characterization of Genome and Metagenome Sequences. *J. Mol. Biol.* **428**,  
673 726–731 (2016).
- 674 75. Altschul, S. F., Gish, W., Miller, W., Myers, E. W. & Lipman, D. J. Basic local alignment  
675 search tool. *J. Mol. Biol.* **215**, 403–410 (1990).
- 676 76. Pelikan, C. *et al.* Diversity analysis of sulfite- and sulfate-reducing microorganisms by  
677 multiplex dsrA and dsrB amplicon sequencing using new primers and mock community-  
678 optimized bioinformatics. *Environ. Microbiol.* **18**, 2994–3009 (2016).
- 679 77. Lücker, S., Nowka, B., Rattei, T., Spieck, E. & Daims, H. The Genome of *Nitrospina gracilis*  
680 Illuminates the Metabolism and Evolution of the Major Marine Nitrite Oxidizer. *Front.*  
681 *Microbiol.* **4**, 27 (2013).
- 682 78. Orellana, L. H., Rodriguez-R, L. M. & Konstantinidis, K. T. ROcker: accurate detection and  
683 quantification of target genes in short-read metagenomic data sets by modeling sliding-  
684 window bitscores. *Nucleic Acids Res.* **45**, e14 (2017).
- 685 79. Chaumeil, P.-A., Mussig, A. J., Hugenholtz, P. & Parks, D. H. GTDB-Tk: a toolkit to classify  
686 genomes with the Genome Taxonomy Database. *Bioinformatics* **36**, 1925–1927 (2020).
- 687 80. Parks, D. H. *et al.* A standardized bacterial taxonomy based on genome phylogeny  
688 substantially revises the tree of life. *Nat. Biotechnol.* **36**, 996–1004 (2018).
- 689 81. Parks, D. H. *et al.* A complete domain-to-species taxonomy for Bacteria and Archaea. *Nat.*  
690 *Biotechnol.* (2020) doi:10.1038/s41587-020-0501-8.
- 691 82. Matsen, F. A., Kodner, R. B. & Armbrust, E. V. pplacer: linear time maximum-likelihood and  
692 Bayesian phylogenetic placement of sequences onto a fixed reference tree. *BMC*  
693 *Bioinformatics* **11**, 538 (2010).
- 694 83. Jain, C., Rodriguez-R, L. M., Phillippy, A. M., Konstantinidis, K. T. & Aluru, S. High  
695 throughput ANI analysis of 90K prokaryotic genomes reveals clear species boundaries.  
696 *Nat. Commun.* **9**, 5114 (2018).
- 697 84. Price, M. N., Dehal, P. S. & Arkin, A. P. FastTree 2 – Approximately Maximum-Likelihood  
698 Trees for Large Alignments. *PLoS One* **5**, e9490 (2010).
- 699 85. Eddy, S. R. Accelerated Profile HMM Searches. *PLoS Comput. Biol.* **7**, e1002195 (2011).
- 700 86. Ondov, B. D. *et al.* Mash: fast genome and metagenome distance estimation using  
701 MinHash. *Genome Biol.* **17**, 132 (2016).
- 702 87. Letunic, I. & Bork, P. Interactive Tree Of Life (iTOL): an online tool for phylogenetic tree  
703 display and annotation. *Bioinformatics* **23**, 127–128 (2007).
- 704 88. Emiola, A. & Oh, J. High throughput in situ metagenomic measurement of bacterial  
705 replication at ultra-low sequencing coverage. *Nat. Commun.* **9**, 4956 (2018).
- 706 89. R Core Team. R: A Language and Environment for Statistical Computing. (2018).
- 707 90. RStudio Team. RStudio: Integrated Development Environment for R. (2016).
- 708 91. Wickham, H. *et al.* Welcome to the Tidyverse. *Journal of Open Source Software* vol. 4 1686  
709 (2019).
- 710 92. Neuwirth, E. RColorBrewer: ColorBrewer palettes [Software]. (2014).

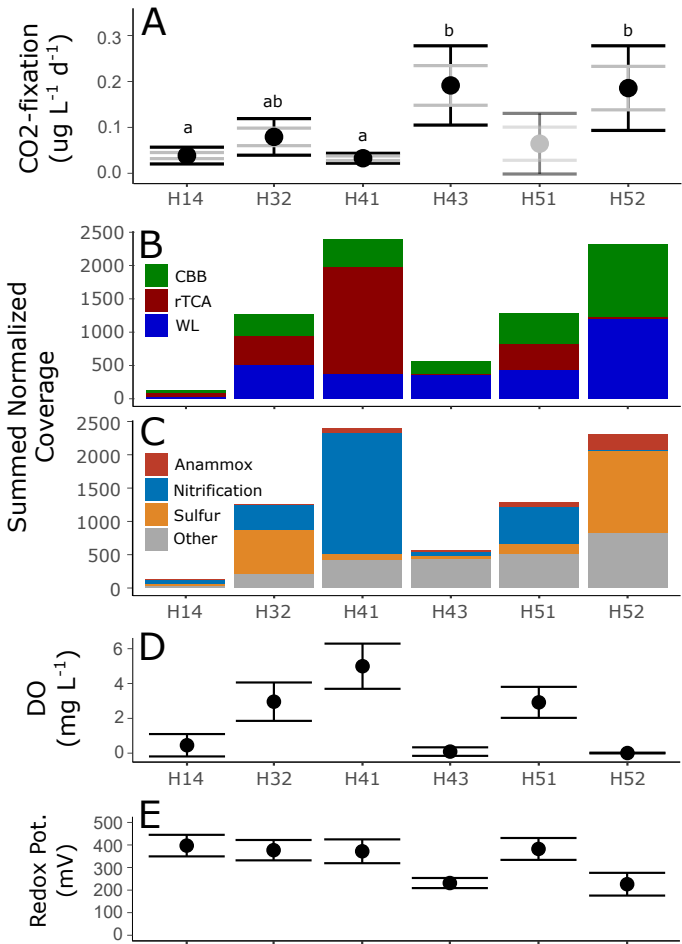

# Figure 2

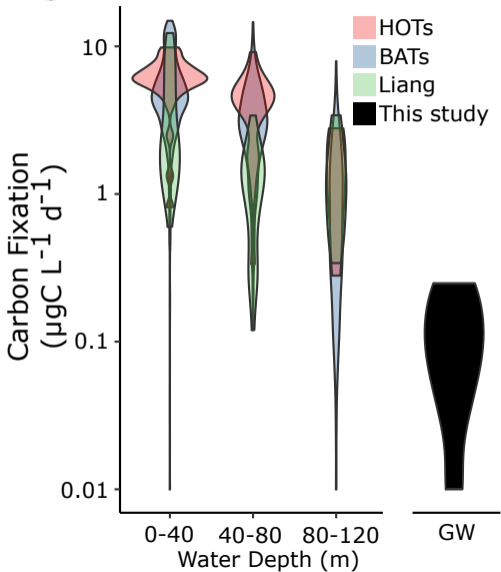

Figure 3

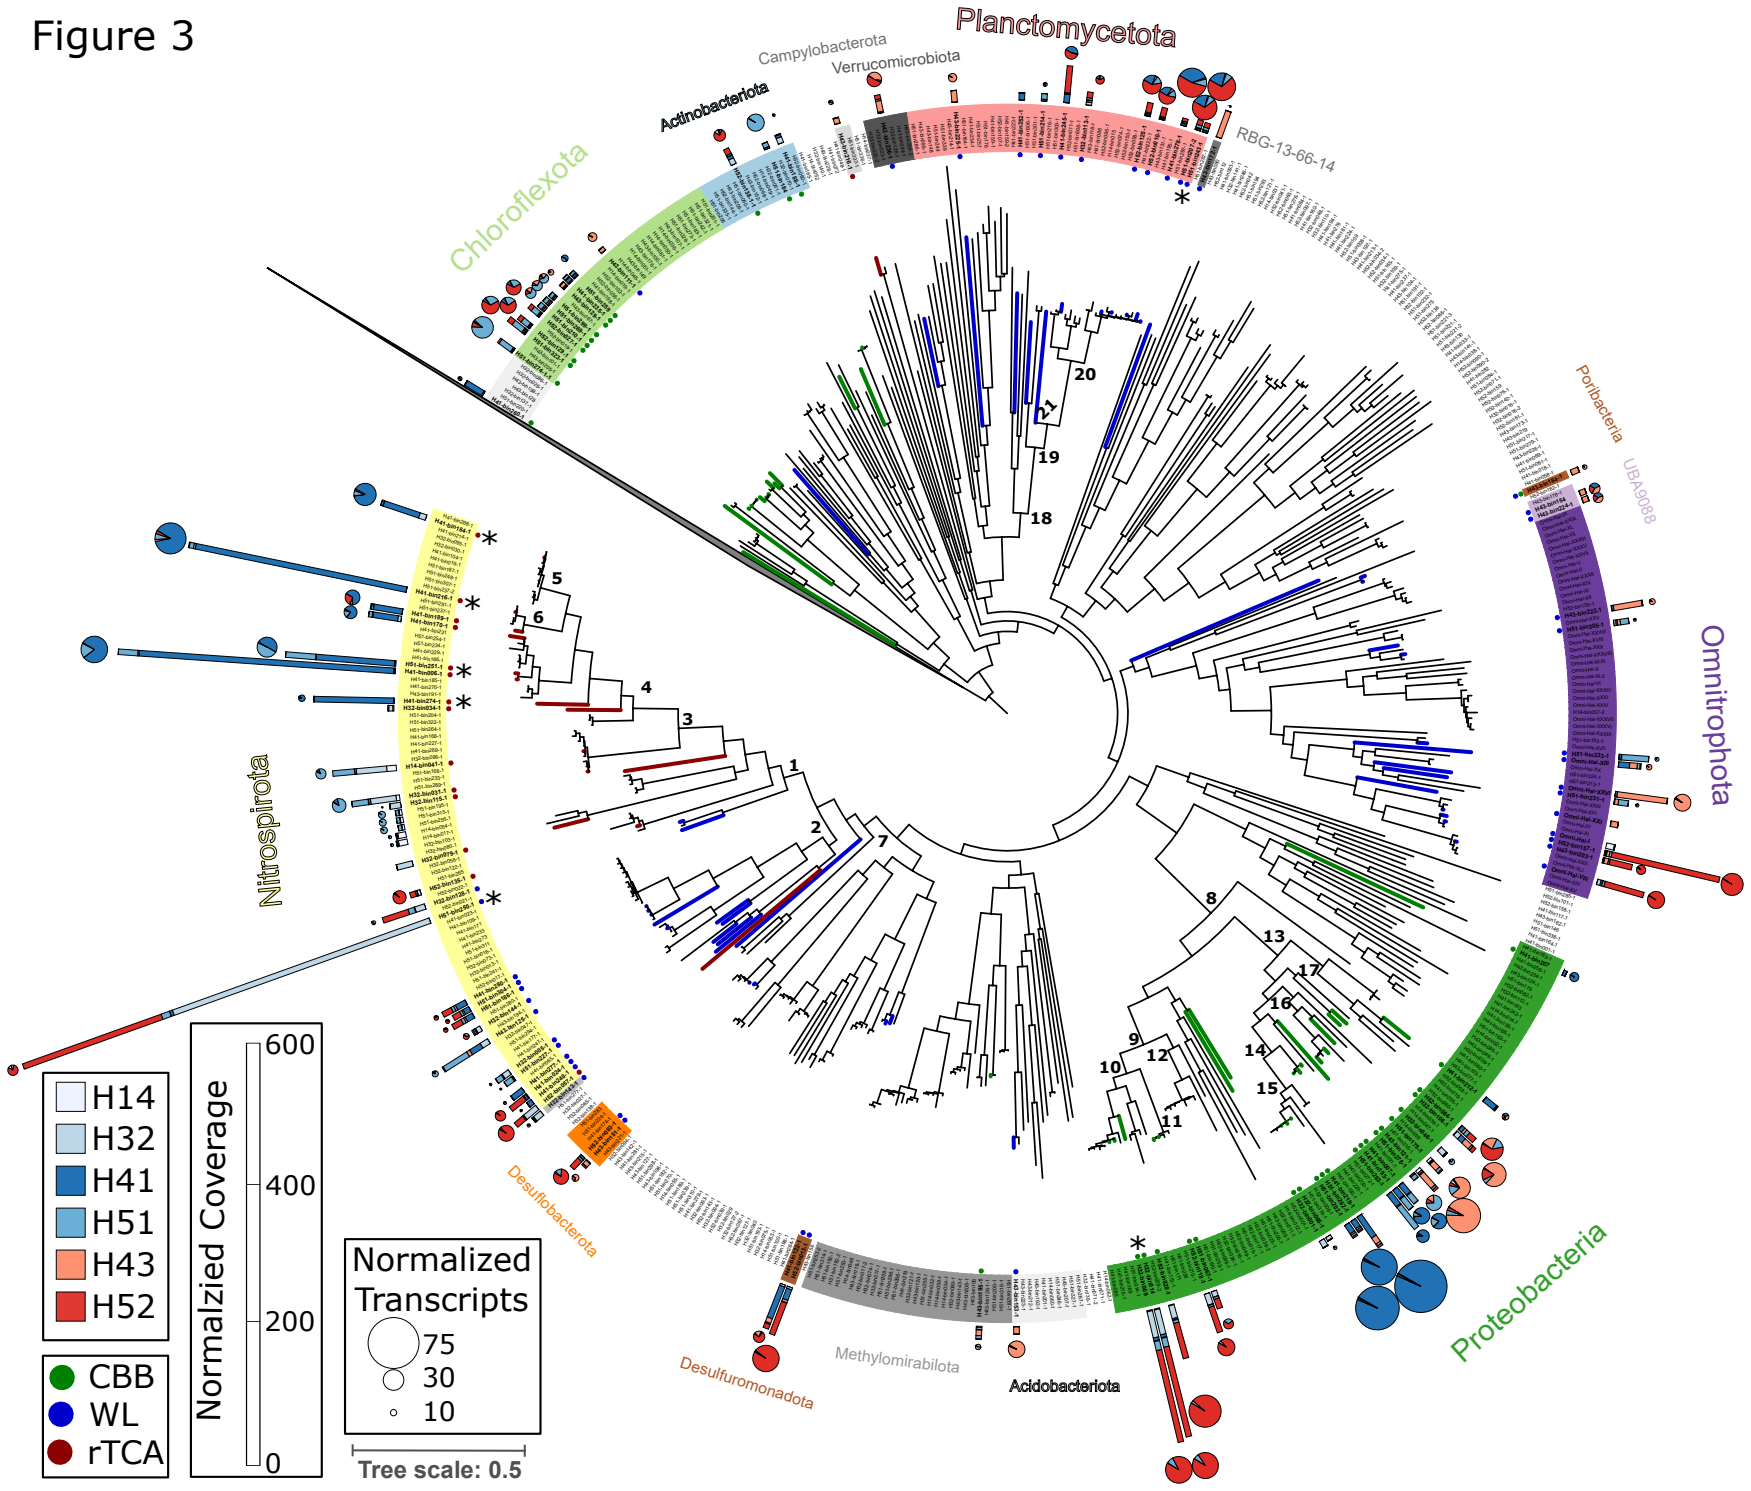

# Figure 4

Nitrospira 9FT-COMBO-42-15  
H51-bin250-1  
92% / 1.4%

## A

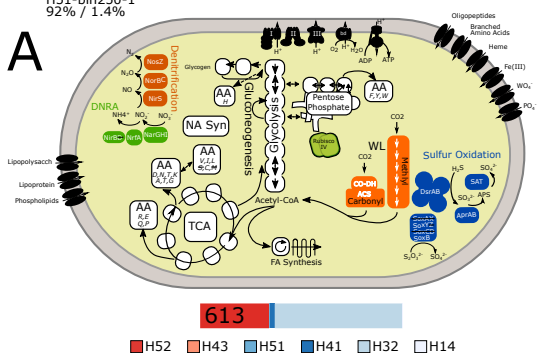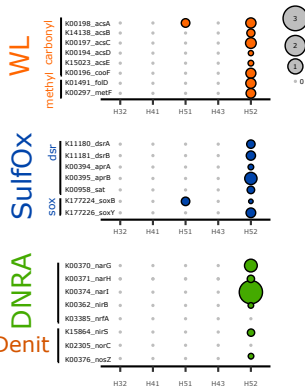

## B

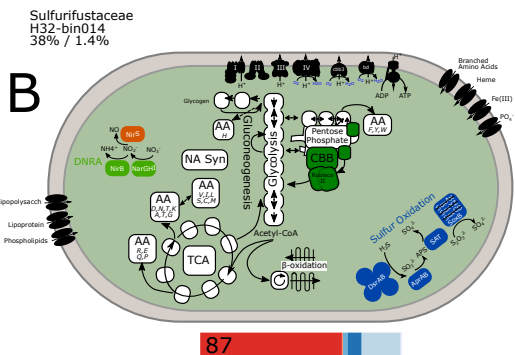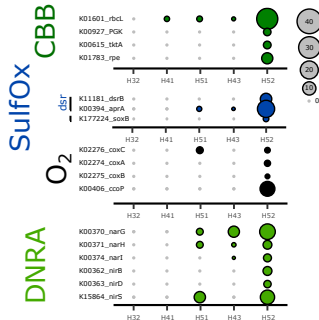

Planctomycetota Brocadiaceae  
H51-bin243-1  
85% / 0%

## C

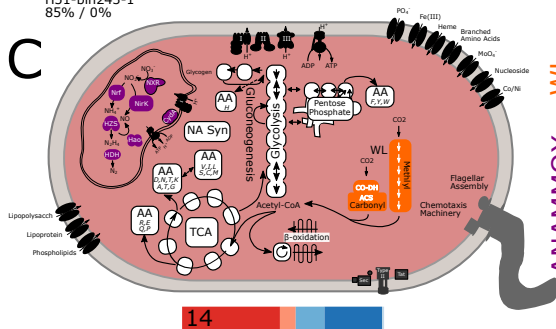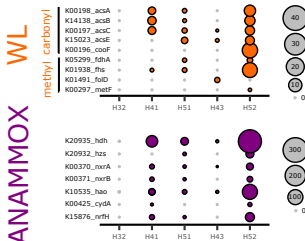

Source: https://www.biorxiv.org/content/10.1101/2021.10.13.464073v1.full.pdf
